# Supplementary material
Source: HighWire-hosted journal article supplement (https://www.annals.org/content/suppl/2006/05/16/0000605-200605160-00125v1)
Supplement: Chaudhry_AT1_144-10-E12-DC1-1.pdf [file Chaudhry_AT1_144-10-E12-DC1-1.pdf]

**Appendix Table 1. Benchmark Leaders in Health Information Technology Research\***

| Study, Year (Reference),<br>Type of Study<br>(n = 52) | Institution           | Data<br>Collection | Primary HIT<br>Intervention | Setting    | Purpose (To Determine the<br>Effect of . . .)                                                                                           | Dimensions<br>of Care End<br>Points | Effect<br>Evaluated        | Key Finding                                                                                                                                                                                                                                                                                                                                                                                                                                                                                                                                                                                                                                        |
|-------------------------------------------------------|-----------------------|--------------------|-----------------------------|------------|-----------------------------------------------------------------------------------------------------------------------------------------|-------------------------------------|----------------------------|----------------------------------------------------------------------------------------------------------------------------------------------------------------------------------------------------------------------------------------------------------------------------------------------------------------------------------------------------------------------------------------------------------------------------------------------------------------------------------------------------------------------------------------------------------------------------------------------------------------------------------------------------|
| <b>Quality adherence<br/>(n = 20)</b>                 |                       |                    |                             |            |                                                                                                                                         |                                     |                            |                                                                                                                                                                                                                                                                                                                                                                                                                                                                                                                                                                                                                                                    |
| Dexter et al.,<br>2004 (18), RCT                      | Regenstrief Institute | 1998–1999          | DS/EHR                      | Inpatient  | Computer-based standing<br>orders vs. computerized<br>physician reminders                                                               | Effectiveness                       | Adherence/<br>surveillance | 12–percentage point absolute increase<br>(from 30% to 42%) in influenza<br>vaccinations and 20–percentage point<br>absolute increase (from 31% to 51%)<br>in pneumococcal vaccinations in the<br>standing-orders group; computer<br>identified 50% and 22% of<br>hospitalized patients as eligible for<br>influenza and pneumococcal<br>vaccinations, respectively; 19% and<br>7% of patients screened by computer<br>as eligible for influenza and<br>pneumococcal vaccines stated that<br>they had previously been vaccinated<br>and did not require another<br>vaccination (data from outside<br>facilities not present in evaluated<br>system) |
| Dexter et al.,<br>1998 (19), RCT                      | Regenstrief Institute | NS                 | DS/EHR                      | Outpatient | Computer-generated,<br>paper-based reminders on<br>planning for end-of-life<br>care vs. usual care (no<br>reminder)                     | Effectiveness                       | Adherence                  | 20–percentage point absolute increase<br>(from 4% to 24%) in physicians who<br>discussed advance directives;<br>11–percentage point absolute<br>increase (from 4% to 15%) in<br>physicians caring for patients who<br>completed advanced care plans                                                                                                                                                                                                                                                                                                                                                                                                |
| Overhage et al.,<br>1997 (20), RCT                    | Regenstrief Institute | 1992–1993          | DS/CPOE                     | Inpatient  | Point-of-care computerized<br>reminders on adherence<br>to guideline-based care vs.<br>usual care (CPOE without<br>evaluated reminders) | Effectiveness/<br>efficiency        | Adherence                  | 24–percentage point absolute increase<br>(from 22% to 46%) in adherence to<br>guidelines; adherence increased for<br>immediate, 24-h, and total hospital<br>stays; little increase between<br>immediate and 24-h adherence; 33%<br>relative decrease (from 156 to 105)<br>in number of pharmacist interventions;<br>no statistically significant difference in<br>costs or length of stay                                                                                                                                                                                                                                                          |

*Continued on following page*

Appendix Table 1—Continued

| Study, Year (Reference), Type of Study (n = 52) | Institution           | Data Collection | Primary HIT Intervention | Setting    | Purpose (To Determine the Effect of . . .)                                                                                                                                                         | Dimensions of Care End Points | Effect Evaluated | Key Finding                                                                                                                                                                                                                                                                                                                                                                                                                                                                                                                                                                                                           |
|-------------------------------------------------|-----------------------|-----------------|--------------------------|------------|----------------------------------------------------------------------------------------------------------------------------------------------------------------------------------------------------|-------------------------------|------------------|-----------------------------------------------------------------------------------------------------------------------------------------------------------------------------------------------------------------------------------------------------------------------------------------------------------------------------------------------------------------------------------------------------------------------------------------------------------------------------------------------------------------------------------------------------------------------------------------------------------------------|
| Overhage et al., 1996 (21), RCT                 | Regenstrief Institute | 1992–1993       | DS/EHR                   | Inpatient  | Computer-generated reminders on use of preventive care services vs. usual care                                                                                                                     | Effectiveness                 | Adherence        | No statistically significant effect demonstrated; high adherence to reminders was anticipated but not demonstrated, and no mechanism to capture reasons for nonadherence was incorporated                                                                                                                                                                                                                                                                                                                                                                                                                             |
| Litzelman et al., 1993 (22), RCT                | Regenstrief Institute | 1989            | DS/EHR                   | Outpatient | Computerized reminders of preventive care; comparison was between requiring physicians to acknowledge the reminder vs. using reminder alone                                                        | Effectiveness                 | Adherence        | In group requiring acknowledgment, 12–percentage point absolute increase (from 49% to 61%) in fecal occult blood testing and 7–percentage point absolute increase (from 47% to 54%) in mammography; no statistically significant improvement in Papanicolaou screening                                                                                                                                                                                                                                                                                                                                                |
| McDonald et al., 1992 (23), RCT                 | Regenstrief Institute | 1978–1981       | DS                       | Outpatient | Computer-generated, paper-based reminders on need for influenza vaccination vs. no computer-based reminders                                                                                        | Effectiveness                 | Adherence        | 12%–18% absolute increase (15.6%–29.5% in year 3) in influenza vaccination rates                                                                                                                                                                                                                                                                                                                                                                                                                                                                                                                                      |
| Tierney et al. (24), 1986, RCT                  | Regenstrief Institute | 1983–1984       | DS/data summary/EHR      | Outpatient | Three interventions on preventive health: 1) computer-generated, paper-based reminders provided each visit; 2) computer-generated, paper-based care summaries generated monthly; and 3) usual care | Effectiveness                 | Adherence        | Approximate absolute effects of computerized reminders: 33–percentage point absolute increase (from 25% to 58%) in fecal occult blood testing, 33–percentage point absolute increase (from 5% to 38%) in pneumococcal vaccination, 16–percentage point absolute increase (8% to 24%) in screening mammography, and 12–percentage point absolute increase (from 12% to 24%) in metronidazole for trichomonas infections; 9 other preventive care processes evaluated showed no statistically or clinically significant improvement with reminders; effects of reminders were greater than those of the summary reports |
| McDonald et al., 1984 (25), CCT                 | Regenstrief Institute | 1978–1980       | DS/EHR                   | Outpatient | Computer-generated, paper-based reminders on adherence to protocol-based care vs. usual care (no reminders)                                                                                        | Effectiveness/efficiency      | Adherence        | 15%–20% increase in adherence to protocol-based care; greatest increases seen in preventive care (relative increase in utilization, 200%–400%); information other than laboratory and pharmacy data entered by research assistants; computer system did not capture all patient data                                                                                                                                                                                                                                                                                                                                  |

Continued on following page

**Appendix Table 1—Continued**

| Study, Year (Reference), Type of Study (n = 52) | Institution           | Data Collection | Primary HIT Intervention | Setting    | Purpose (To Determine the Effect of . . .)                                                                                                     | Dimensions of Care End Points   | Effect Evaluated            | Key Finding                                                                                                                                                                                                                                                                                                                                                                                                                                                                               |
|-------------------------------------------------|-----------------------|-----------------|--------------------------|------------|------------------------------------------------------------------------------------------------------------------------------------------------|---------------------------------|-----------------------------|-------------------------------------------------------------------------------------------------------------------------------------------------------------------------------------------------------------------------------------------------------------------------------------------------------------------------------------------------------------------------------------------------------------------------------------------------------------------------------------------|
| McDonald et al., 1980 (26), CCT                 | Regenstrief Institute | NS              | DS/EHR                   | Outpatient | Computer-generated, paper-based reminders with and without literature citations on adherence to protocol-based care vs. usual care             | Effectiveness                   | Adherence/medical errors    | 19–percentage point absolute increase (from 19.8% to 38.4%) in adherence to protocol-based care; minimal learning effects were seen when the computerized reminders were turned off                                                                                                                                                                                                                                                                                                       |
| McDonald, 1976 (27), RCT                        | Regenstrief Institute | NS              | DS/EHR                   | Outpatient | Computer-generated, paper-based reminders on adherence to protocol-based care for diabetes                                                     | Effectiveness/safety/efficiency | Adherence/medication errors | 15–percentage point increase (from 11% to 36% and from 13% to 28%) in adherence to protocols; computer systems could not capture all laboratory data kept in paper chart; physicians agreed with a maximum of 57% of computer recommendations; most reminders related to medication care; cost \$2/visit to maintain computer record                                                                                                                                                      |
| McDonald, 1976 (28), RCT                        | Regenstrief Institute | 1975            | DS/EHR                   | Outpatient | Computer-generated, paper-based reminders on adherence to protocol-based care                                                                  | Effectiveness/safety            | Adherence/medication errors | 29–percentage point absolute increase (from 22% to 51%) in adherence to protocols; computer system could not capture all laboratory data kept in paper chart; most reminders related to medication-based care                                                                                                                                                                                                                                                                             |
| Kucher et al., 2005 (29), CCT                   | Partners Health Care  | 2000–2004       | DS/CPOE                  | Inpatient  | Computerized alerts for anticoagulation prophylaxis vs. usual care for prevention of venous thromboembolism in high-risk hospitalized patients | Effectiveness                   | Adherence/surveillance      | 3.3–percentage point absolute decrease (from 8.2% to 4.9%) in the combined primary end point of deep venous thrombosis or pulmonary embolism within 90 d after hospitalization; 19–percentage point absolute increase (from 33.5% to 14.5%) in use of anticoagulation prophylaxis; as part of intervention, a computer-based risk assessment program was used to screen and identify inpatients at high risk for venous thromboembolism; 80% of patients enrolled had some type of cancer |
| Abookire et al., 2000 (30), time-series study   | Partners Health Care  | 1995–1999       | DS/CPOE                  | Inpatient  | Trends in alerts and physician response to alerts                                                                                              | Safety/effectiveness            | Adherence                   | 24–percentage point absolute reduction (from 51% to 27%) in adherence to “definite” medication allergy alerts and 26–percentage point absolute reduction in adherence (from 46% to 20%) to “possible” allergy alerts over 4 y; adherence decreased as number of alerts increased                                                                                                                                                                                                          |

*Continued on following page*

Appendix Table 1—Continued

| Study, Year (Reference), Type of Study (n = 52) | Institution                                       | Data Collection | Primary HIT Intervention | Setting    | Purpose (To Determine the Effect of . . .)                                                                                           | Dimensions of Care End Points | Effect Evaluated | Key Finding                                                                                                                                                                                                                                                                                                                                                                                                                                                                                                                                                             |
|-------------------------------------------------|---------------------------------------------------|-----------------|--------------------------|------------|--------------------------------------------------------------------------------------------------------------------------------------|-------------------------------|------------------|-------------------------------------------------------------------------------------------------------------------------------------------------------------------------------------------------------------------------------------------------------------------------------------------------------------------------------------------------------------------------------------------------------------------------------------------------------------------------------------------------------------------------------------------------------------------------|
| Teich et al., 2000 (31), pre–post study         | Brigham and Women's Hospital/Partners Health Care | 1993            | CPOE/DS                  | Inpatient  | Effect of CPOE on physician prescribing practices and adherence to medication formularies                                            | Effectiveness/safety          | Adherence        | 66–percentage point absolute increase (from 15.6% to 81.3%) in formulary adherence for gastric H <sub>2</sub> -blockers; 23–percentage point absolute increase (from 24% to 47%) in appropriate use of subcutaneous heparin prophylaxis; 1.5–percentage point absolute decrease (from 2.1% to 0.6%) in number of medication doses written that exceeded maximum recommended (“possibly because of increased use of order sets”); effects persisted at 1- and 2-y follow-up; cost savings from H <sub>2</sub> -blocker, \$250 000; costs to maintain system, \$700 000/y |
| Cannon and Allen 2000 (32), RCT                 | VA                                                | 1998            | DS/EHR                   | Outpatient | Guideline-based computerized vs. manual paper-based reminders on screening rates for mood disorders                                  | Effectiveness                 | Adherence        | 25.5–percentage point absolute increase (from 61% to 86.5%) in physician screening for mood disorders with computerized system                                                                                                                                                                                                                                                                                                                                                                                                                                          |
| Demakis et al., 2000 (33), RCT                  | VA                                                | 1995–1996       | DS/EHR                   | Outpatient | Computerized reminders on physician adherence to ambulatory care recommendations vs. usual care (EHR without hypertension reminders) | Effectiveness                 | Adherence        | 5.3–percentage point absolute increase (from 53.5% to 58.8%) in adherence to recommended care; 5 of 13 examined care processes improved; effect of reminders decreased over time                                                                                                                                                                                                                                                                                                                                                                                        |
| Rossi and Every, 1997 (34), RCT                 | VA                                                | 1996            | DS                       | Outpatient | Computer-generated, paper-based reminders on adherence to appropriate care for hypertension treatment vs. usual care (no reminders)  | Effectiveness                 | Adherence        | 11.3–percentage point absolute increase (from <1% to 11.3%) in appropriate hypertension treatment                                                                                                                                                                                                                                                                                                                                                                                                                                                                       |
| Willson et al., 1995 (35), pre–post study       | LDS Hospital/Intermountain Health Care            | 1994–NS         | DS                       | Inpatient  | Computerized guidelines for prevention and treatment of pressure ulcers                                                              | Effectiveness                 | Adherence        | 5–percentage point absolute decrease (from 7% to 2%) in ulcer development                                                                                                                                                                                                                                                                                                                                                                                                                                                                                               |

Continued on following page

Appendix Table 1—Continued

| Study, Year (Reference), Type of Study (n = 52) | Institution                                       | Data Collection | Primary HIT Intervention     | Setting    | Purpose (To Determine the Effect of . . .)                                                                                   | Dimensions of Care End Points | Effect Evaluated | Key Finding                                                                                                                                                                                                                                                                                                                                                                                                                                                                                                                                                                                                                              |
|-------------------------------------------------|---------------------------------------------------|-----------------|------------------------------|------------|------------------------------------------------------------------------------------------------------------------------------|-------------------------------|------------------|------------------------------------------------------------------------------------------------------------------------------------------------------------------------------------------------------------------------------------------------------------------------------------------------------------------------------------------------------------------------------------------------------------------------------------------------------------------------------------------------------------------------------------------------------------------------------------------------------------------------------------------|
| Evans et al., 1994 (36), RCT                    | LDS Hospital/ Intermountain Health Care           | 1990            | DS/EHR                       | Inpatient  | Computerized guidelines on appropriateness of antibiotic use                                                                 | Effectiveness                 | Adherence        | Computer program suggested correct antibiotic in 94% of cases; 17–percentage point absolute increase (from 77% to 94%) in coverage of identified organism; 27% relative decrease (from 22 to 16 h) in time to appropriate treatment after culture results; 21% relative decrease (from \$51.93 to \$41.08) in antibiotic cost; physicians ordered appropriate antibiotics within 12 h of culture collection significantly more often with use of program compared with usual care; 88% of physicians would recommend the program to other physicians, 85% said the program improved antibiotic selection, and 81% said use improved care |
| Larsen et al., 1989 (37), pre–post study        | LDS Hospital/ Intermountain Health Care           | 1985–1986       | DS                           | Inpatient  | Computerized reminders on appropriateness of preoperative antibiotics and on rates of postoperative wound infections         | Effectiveness                 | Adherence        | 0.4–percentage point absolute decrease (from 1.1% to 0.7%) in total postoperative wound infections; 0.9–percentage point absolute decrease (from 1.8% to 0.9%) in wound infections among patients with general indication for antibiotic prophylaxis; 18–percentage point increase (from 40% to 58%) in appropriateness of antibiotic timing                                                                                                                                                                                                                                                                                             |
| <b>Surveillance (n = 9)</b>                     |                                                   |                 |                              |            |                                                                                                                              |                               |                  |                                                                                                                                                                                                                                                                                                                                                                                                                                                                                                                                                                                                                                          |
| Overhage et al., 2001 (38), case–control study  | Regenstrief Institute                             | 2000–2001       | Electronic results reporting | Outpatient | Electronic laboratory reporting on public health surveillance                                                                | Access/ effectiveness         | Surveillance     | 29–percentage point increase (from 71% to 100%) in identified cases during a shigellosis outbreak; 2.5-d decrease in reporting time                                                                                                                                                                                                                                                                                                                                                                                                                                                                                                      |
| Honigman et al., 2001 (39), cohort study        | Brigham and Women's Hospital/Partners Health Care | 1995–1996       | EHR                          | Outpatient | Computer program to retrospectively detect ADEs vs. chart review                                                             | Safety                        | Surveillance     | Sensitivity for ADEs, 58%; specificity, 88%; ADE rate was 5.5/100 patients; 9% of outpatient ADEs required hospitalization                                                                                                                                                                                                                                                                                                                                                                                                                                                                                                               |
| Jha et al., 1998 (40), case series              | Brigham and Women's Hospital/Partners Health Care | 1995            | Data summary/ CPOE           | Inpatient  | Three interventions for identifying adverse drug events: 1) computer monitoring, 2) chart review, and 3) voluntary reporting | Safety                        | Surveillance     | Computerized monitoring identified 45% of ADEs; chart review identified 65%; voluntary reporting identified 4%; computer was better for ADEs related to quantitative changes (e.g., laboratory values) and chart review was better for ADEs related only to symptoms; voluntary reporting was better for potential ADEs that had not yet occurred                                                                                                                                                                                                                                                                                        |

Continued on following page

Appendix Table 1—Continued

| Study, Year (Reference), Type of Study (n = 52) | Institution                             | Data Collection | Primary HIT Intervention       | Setting    | Purpose (To Determine the Effect of . . .)                                                                                                         | Dimensions of Care End Points | Effect Evaluated                | Key Finding                                                                                                                                                                                                                                                                                                                                                                                                                                                                                             |
|-------------------------------------------------|-----------------------------------------|-----------------|--------------------------------|------------|----------------------------------------------------------------------------------------------------------------------------------------------------|-------------------------------|---------------------------------|---------------------------------------------------------------------------------------------------------------------------------------------------------------------------------------------------------------------------------------------------------------------------------------------------------------------------------------------------------------------------------------------------------------------------------------------------------------------------------------------------------|
| Kramer et al., 2003 (41), case series           | VA                                      | 1999–2000       | Electronic data collection/EHR | Outpatient | Automated data collection algorithms vs. manual review of EHRs by trained abstracters on diagnosing new cases of depression                        | Effectiveness                 | Surveillance                    | High false-positive rate for diagnosis via automated algorithms; quality indicator scores based solely on automated data show agreement with manual review, but results may show some bias                                                                                                                                                                                                                                                                                                              |
| Kerr et al., 2002 (42), case series             | VA                                      | 1999–2000       | Electronic data collection/EHR | Mixed      | Automated queries of computerized disease registries vs. manual chart abstraction (mixed EHR and paper chart sources) on measuring quality of care | Effectiveness                 | Surveillance                    | Automated queries from disease registries underestimated rates of completion for quality-of-care process indicators; no differences were noted for intermediate outcome measures; automated queries were less labor-intensive                                                                                                                                                                                                                                                                           |
| Classen et al., 1997 (43), case-control study   | LDS Hospital/ Intermountain Health Care | 1990–1993       | Data summary/ DS/EHR           | Inpatient  | Computer surveillance to identify ADEs and associated costs                                                                                        | Efficiency                    | Surveillance                    | Computer system was used to screen 91 574 admissions for ADEs; 2.43 ADEs/100 admissions; 2.45–absolute percentage point increase (from 1.05% to 3.5%) in crude mortality associated with ADEs; 1.9-d increase in attributable length of stay and associated \$2262 increase in costs                                                                                                                                                                                                                    |
| Evans et al., 1992 (44), case-control study     | LDS Hospital/ Intermountain Health Care | 1989–1992       | Data summary/EHR               | Inpatient  | Computerized surveillance vs. manual reporting on identifying and preventing ADEs                                                                  | Safety                        | Surveillance                    | 2.36–percentage point absolute increase (from 0.04% to 2.4%) in identified ADEs; alerting system implemented in year 2 in which pharmacists received surveillance reports and contacted physicians; severe ADEs decreased 5.4 percentage points (from 7.6% to 2.2%); ADEs due to allergies decreased 13.6 percentage points (from 15% to 1.4%); analysis of ADE database allowed authors to design reduction initiatives that decreased significant ADEs from 56 events in year 1 to 8 events in year 3 |
| Evans et al., 1993 (45), case-control           | LDS Hospital/ Intermountain Health Care | 1990–1992       | Data summary/ DS/EHR           | Inpatient  | Computerized surveillance on determining attributable effect of ADEs on hospital length of stay and costs                                          | Safety/ efficiency            | Surveillance/ medication errors | Computer system was used to screen the records of 60 836 inpatients; 1348 ADEs were identified in 1209 patients; those with ADEs were matched to a total of 10 542 control patients; ADEs were associated with an attributable increase in length of stay of 1.9 d and increase in attributable costs of \$1939                                                                                                                                                                                         |

Continued on following page

Appendix Table 1—Continued

| Study, Year (Reference), Type of Study (n = 52) | Institution                                       | Data Collection | Primary HIT Intervention | Setting   | Purpose (To Determine the Effect of . . .)                                                                                                      | Dimensions of Care End Points | Effect Evaluated             | Key Finding                                                                                                                                                                                                                                                                                                                                                                                                                                                                            |
|-------------------------------------------------|---------------------------------------------------|-----------------|--------------------------|-----------|-------------------------------------------------------------------------------------------------------------------------------------------------|-------------------------------|------------------------------|----------------------------------------------------------------------------------------------------------------------------------------------------------------------------------------------------------------------------------------------------------------------------------------------------------------------------------------------------------------------------------------------------------------------------------------------------------------------------------------|
| Evans et al., 1986 (46), cohort study           | LDS Hospital/ Intermountain Health Care           | 1984            | Data summary/ EHR        | Inpatient | Computer vs. manual surveillance for assessing rates of hospital-acquired infections and associated antibiotic use                              | Safety                        | Surveillance                 | 14–percentage point absolute increase (from 76% to 90%) in identification of infections; 65% decrease (from 130 to 46 h) in time required for surveillance; 4–percentage point absolute increase (from 19% to 23%) in false-positive rates with the computer; computer screening identified patients receiving antibiotics to which infections were resistant, antibiotics with less expensive alternatives, and patients receiving prophylactic antibiotics for longer than necessary |
| <b>Medication errors (n = 7)</b>                |                                                   |                 |                          |           |                                                                                                                                                 |                               |                              |                                                                                                                                                                                                                                                                                                                                                                                                                                                                                        |
| Chertow et al., 2001 (47), CCT                  | Brigham and Women's Hospital/Partners Health Care | 1997–1998       | DS/CPOE                  | Inpatient | Computerized drug dosing algorithm to determine effect on medication prescribing in renal insufficiency vs. usual care (CPOE without algorithm) | Efficiency/ effectiveness     | Medication errors/ adherence | 21–percentage point absolute increase (from 30% to 51%) in appropriate medication orders (dosing levels or dosing frequency); 4.5% reduction (from 4.5 to 4.3 d) in length of stay; no statistically significant decrease in costs                                                                                                                                                                                                                                                     |
| Bates et al., 1999 (48), time-series study      | Brigham and Women's Hospital/Partners Health Care | 1992–1997       | CPOE/DS                  | Inpatient | CPOE with enhanced DS on rates of nonmissed dose errors and overall noninterrupted serious medication error rates                               | Safety                        | Medication errors            | 86% relative reduction (from 7.6 events/1000 patient-days to 1.1 events/1000 patient-days) in nonintercepted serious medication errors; 82% relative reduction (from 142 events/1000 patient-days to 26.6 events/1000 patient-days) in nonmissed dose errors; reductions seen for all error types; level of DS in system increased over time                                                                                                                                           |
| Bates et al., 1998 (49), time-series study      | Brigham and Women's Hospital/Partners Health Care | 1993–1995       | CPOE/DS                  | Inpatient | CPOE on rates of medication errors and preventable ADEs vs. CPOE with addition of team changes                                                  | Safety                        | Medication errors            | 55% relative risk reduction (from 10.7 events/1000 patient-days to 4.9 events/1000 patient-days) in nonintercepted serious medication errors; non–statistically significant 17% relative reduction (from 4.69/1000 patient-days to 3.86/1000 patient-days) in preventable ADEs; decreases seen for all levels of error severity; team changes conferred no additional benefit over CPOE                                                                                                |

Continued on following page

Appendix Table 1—Continued

| Study, Year (Reference), Type of Study (n = 52)               | Institution                             | Data Collection | Primary HIT Intervention | Setting         | Purpose (To Determine the Effect of . . .)                                             | Dimensions of Care End Points     | Effect Evaluated                       | Key Finding                                                                                                                                                                                                                                                                                                                                                                                                                                                                                    |
|---------------------------------------------------------------|-----------------------------------------|-----------------|--------------------------|-----------------|----------------------------------------------------------------------------------------|-----------------------------------|----------------------------------------|------------------------------------------------------------------------------------------------------------------------------------------------------------------------------------------------------------------------------------------------------------------------------------------------------------------------------------------------------------------------------------------------------------------------------------------------------------------------------------------------|
| Mullett et al., 2001 (50), pre-post study                     | LDS Hospital/ Intermountain Health Care | 1998–1999       | DS/EHR                   | Pediatric ICU   | Computerized guidelines on antibiotic appropriateness and use                          | Effectiveness/ efficiency         | Medication errors/ adherence           | 32% relative decrease (from 15.8 to 10.8) in number of days that antibiotics were prescribed outside the recommended dosing range; 59% relative decrease in a composite measure of need for pharmacist interventions for incorrect dosing; 6.3–percentage point absolute increase (from 60.2% to 66.5%) in proportion of ICU patients receiving antibiotics; no statistically significant differences in overall antibiotic costs; weighted antibiotic-cost statistic showed decrease in costs |
| Evans et al., 1999 (51), pre-post study                       | LDS Hospital/ Intermountain Health Care | 1993–1996       | DS/EHR                   | Inpatient       | Computerized monitoring of antibiotic doses on appropriateness of dosing and ADE rates | Safety                            | Medication errors/ utilization of care | 0.6–percentage point absolute decrease (from 0.9% to 0.3%) in antibiotic-associated ADEs; 6% relative decrease (from 50% to 40%) in patients receiving excess antibiotic doses for $\geq 1$ d; 12% relative decrease (from 10.1 to 8.9 doses) in number of antibiotic doses prescribed and 13% relative decrease in cost (from \$92.96 to \$80.62); excess dosing was associated with increased ADE rates                                                                                      |
| Evans et al., 1998 (52), cohort study with historical control | LDS Hospital/ Intermountain Health Care | 1992–1995       | DS/EHR                   | Inpatient (ICU) | Computerized alerts on antibiotic use                                                  | Effectiveness/ efficiency/ safety | Medication errors/ adherence           | Compared with the 2-y preintervention period, reductions were seen for the following: antibiotic-associated ADEs (28 vs. 4), mismatches between infection susceptibility and antibiotic (206 vs. 12 episodes), ordered drugs for which a patient had an allergy (146 vs. 35 episodes), days of excess dosing (from 5.9 to 2.7 d), antibiotic costs (from \$340 to \$102), length of stay (from 13 to 10 d), and total hospital costs (from \$35 283 to \$26 315)                               |
| White et al., 1984 (53), RCT                                  | LDS Hospital/ Intermountain Health Care | NS              | DS                       | Inpatient       | Computer-generated, paper-based alert system on digoxin toxicity                       | Safety                            | Medication errors                      | 2.8-fold increase in withholding digoxin on day alert was signaled; 2.7-fold increase in testing of serum digoxin levels in response to alerts; overall, 22% increase in physician actions in response to digoxin-related events (unweighted event rates in study groups not provided)                                                                                                                                                                                                         |

Continued on following page

Appendix Table 1—Continued

| Study, Year (Reference), Type of Study (n = 52) | Institution                                       | Data Collection | Primary HIT Intervention | Setting              | Purpose (To Determine the Effect of . . .)                                                                                               | Dimensions of Care End Points | Effect Evaluated    | Key Finding                                                                                                                                                                                                                                                                                                                                                                                                                                                                                                     |
|-------------------------------------------------|---------------------------------------------------|-----------------|--------------------------|----------------------|------------------------------------------------------------------------------------------------------------------------------------------|-------------------------------|---------------------|-----------------------------------------------------------------------------------------------------------------------------------------------------------------------------------------------------------------------------------------------------------------------------------------------------------------------------------------------------------------------------------------------------------------------------------------------------------------------------------------------------------------|
| <b>Efficiency: utilization of care (n = 10)</b> |                                                   |                 |                          |                      |                                                                                                                                          |                               |                     |                                                                                                                                                                                                                                                                                                                                                                                                                                                                                                                 |
| Tierney et al., 1988 (54), RCT                  | Regenstrief                                       | 1984–1985       | DS/CPOE                  | Outpatient           | Computer program that generates and displays pretest probabilities for diagnostic tests on utilization of care                           | Efficiency                    | Utilization of care | 8.8% decrease (from \$12.27 to \$11.18) in diagnostic test costs per patient visit; greatest decrease was due to reduced utilization of complete blood counts and electrolytes (the 2 most common tests); mean receiver-operating characteristic curve for computer predictions, 0.80                                                                                                                                                                                                                           |
| Tierney et al., 1987 (55), pre–post study       | Regenstrief                                       | NS              | DS/CPOE/EHR              | Outpatient           | Computer program showing previous test results as physicians are ordering new tests vs. usual care (no display of previous test results) | Efficiency                    | Utilization of care | 8.5% decrease (from 0.56 to 0.51) in number of tests ordered per visit; 13% decrease (from \$13.99 to \$12.17) in test costs per visit; program took 4 s to display past results on screen per test                                                                                                                                                                                                                                                                                                             |
| Tierney et al., 1990 (56), RCT                  | Regenstrief                                       | 1988            | DS/CPOE/EHR              | Outpatient           | Effect of information on point-of-care test costs on utilization vs. usual care (CPOE without information on test costs)                 | Efficiency                    | Utilization of care | 14.3% decrease (from 1.82 to 1.56) in number of diagnostic tests ordered per visit; 12.9% decrease (from \$51.81 to \$45.13) in diagnostic test costs per visit; effect was greatest for scheduled patient visits                                                                                                                                                                                                                                                                                               |
| Tierney et al., 1993 (57), RCT                  | Regenstrief                                       | 1990–1991       | CPOE/EHR                 | Inpatient            | CPOE on costs and utilization of health care                                                                                             | Efficiency                    | Utilization of care | 12.7% reduction (from \$6964 to \$6077) in total costs per admission; statistically significant decreases in hospital bed, medication, and diagnostic test costs; 0.9-d decrease (from 8.5 to 7.6 d) in length of stay; 33-min increase in physician time spent ordering tests                                                                                                                                                                                                                                  |
| Wilson et al., 1982 (58), RCT                   | Regenstrief                                       | NS              | EHR                      | Emergency department | Computer-generated, paper-based patient record summaries on utilization of care vs. usual care (no care summaries)                       | Efficiency                    | Utilization of care | Study interrupted by an interval programming error that prevented the previous 4–6 mo of a patient's data from being printed, thus dividing the study into 2 time periods, T1 and T2; 18% decrease (from 3.28 tests/visit to 2.23 tests/visit) in tests ordered for medical visits during T1; 14% decrease (from \$34.91 to \$29.94) in costs; non–statistically significant decrease in tests ordered for surgical visits during T1; no statistically significant difference in utilization or costs during T2 |
| Chen et al., 2003 (59), pre–post study          | Brigham and Women's Hospital/Partners Health Care | 1995–1999       | DS/CPOE                  | Inpatient            | Computerized reminders on rates of inappropriate daily testing of antiepileptic drug levels                                              | Effectiveness/efficiency      | Utilization of care | 27% decrease (53 of 200 total) in redundant laboratory tests of antiepileptic medication levels; effect of reminders stable over 4 y                                                                                                                                                                                                                                                                                                                                                                            |

Continued on following page

Appendix Table 1—Continued

| Study, Year (Reference), Type of Study (n = 52)      | Institution                                       | Data Collection | Primary HIT Intervention | Setting    | Purpose (To Determine the Effect of . . .)                                                                                                             | Dimensions of Care End Points | Effect Evaluated                      | Key Finding                                                                                                                                                                                                                                                                                                                                                                                                 |
|------------------------------------------------------|---------------------------------------------------|-----------------|--------------------------|------------|--------------------------------------------------------------------------------------------------------------------------------------------------------|-------------------------------|---------------------------------------|-------------------------------------------------------------------------------------------------------------------------------------------------------------------------------------------------------------------------------------------------------------------------------------------------------------------------------------------------------------------------------------------------------------|
| Bates et al., 1999 (60), RCT                         | Brigham and Women's Hospital/Partners Health Care | 1994            | DS/CPOE                  | Inpatient  | Computerized reminders on use of laboratory tests, redundant ordering, and associated costs vs. usual care (CPOE without laboratory-related reminders) | Efficiency                    | Utilization of care                   | 24–percentage point absolute reduction (from 51% to 27%) in redundant tests; 31% of reminders were overridden by physicians; 41% of overrides were justified; 56% of redundant tests ordered in intervention group were not ordered via computer; only 51% of redundant tests ordered in control group were actually performed; estimated cost savings, \$35 000/y (0.15% of total laboratory expenditures) |
| Shojania et al., 1998 (61), RCT                      | Brigham and Women's Hospital/Partners Health Care | 1996–1997       | DS/CPOE                  | Inpatient  | Point-of-care computerized guidelines on antibiotic use vs. usual care (CPOE without antibiotic DS)                                                    | Effectiveness                 | Utilization of care                   | 32% relative decrease (from 16.7 orders/physician to 11.3 orders/physician) in antibiotic orders; both initial and renewal order rates decreased                                                                                                                                                                                                                                                            |
| Fihn et al., 1994 (62), RCT                          | VA                                                | NS              | Administrative/DS        | Outpatient | Computerized scheduling system on follow-up time for anticoagulation monitoring vs. usual care                                                         | Safety/access/effectiveness   | Utilization of care/medication errors | Approximate 6-d increase (from 25 to 31 d) in follow-up appointment interval; no statistically significant differences in anticoagulation levels or complication rates                                                                                                                                                                                                                                      |
| Steele et al., 1989 (63), RCT                        | VA                                                | 1987–1988       | Data summary/DS          | Outpatient | Computer-generated, paper-based feedback of medication costs vs. in-person pharmacist counseling on physician prescribing costs                        | Efficiency                    | Utilization of care                   | No statistically significant differences in costs were found with computer-based system vs. pharmacist counseling                                                                                                                                                                                                                                                                                           |
| <b>Efficiency: time (n = 6)</b>                      |                                                   |                 |                          |            |                                                                                                                                                        |                               |                                       |                                                                                                                                                                                                                                                                                                                                                                                                             |
| Overhage et al., 2001 (64), RCT, time-motion study   | Regenstrief                                       | 1996–1998       | CPOE/EHR                 | Outpatient | CPOE on physician time utilization                                                                                                                     | Efficiency                    | Time utilization                      | 6.2% increase (from 34.2 to 36.3 min) in physician time per clinic visit; physicians continued to use paper despite CPOE, thereby duplicating tasks; with experience there was a non–statistically significant decrease in physician time of approximately 10% (3.7 min) per clinic visit                                                                                                                   |
| Kuperman et al., 1996 (65), cross-sectional analysis | Brigham and Women's Hospital/Partners Health Care | 1995–1996       | DS                       | Inpatient  | Computerized alerts sent via pager on physician response to serious clinical events                                                                    | Safety/effectiveness          | Time to utilization/response          | Physicians responded to 70% of alerts (1214 of 1730 alerts) and immediately placed orders in response to 39% of answered alerts; physicians responded to 82.5% of answered alerts (1002 of 1214) in < 15 min                                                                                                                                                                                                |

Continued on following page

**Appendix Table 1—Continued**

| Study, Year (Reference), Type of Study (n = 52)           | Institution                                       | Data Collection | Primary HIT Intervention | Setting         | Purpose (To Determine the Effect of . . .)                                                   | Dimensions of Care End Points | Effect Evaluated    | Key Finding                                                                                                                                                                                                                               |
|-----------------------------------------------------------|---------------------------------------------------|-----------------|--------------------------|-----------------|----------------------------------------------------------------------------------------------|-------------------------------|---------------------|-------------------------------------------------------------------------------------------------------------------------------------------------------------------------------------------------------------------------------------------|
| Kuperman et al., 1999 (66), RCT                           | Brigham and Women's Hospital/Partners Health Care | 1994–1995       | DS                       | Inpatient       | Computerized alerts sent via pager on physician response time to critical laboratory results | Safety/ effectiveness         | Time to care/safety | 38% decrease (from 1.6 to 1.0 h) in median time until treatment ordered; 11% decrease in mean time (from 4.6 to 4.1 h) until treatment; no statistically significant decrease in ADEs                                                     |
| Pizziferri et al., 2005 (67), pre-post, time-motion study | Brigham and Women's Hospital/Partners Health Care | 2001–2003       | EHR                      | Outpatient      | EHR use on physician time utilization in clinic                                              | Efficiency                    | Time utilization    | 0.5-min decrease (from 27.55 to 27.05 min) in clinic visit time; physicians felt EHRs improved quality, access, and communication but negatively affected workload                                                                        |
| Wong et al., 2003 (68), pre-post, time-motion study       | VA                                                | NS              | EHR                      | Inpatient (ICU) | Computerized documentation on nursing time utilization                                       | Efficiency                    | Time utilization    | 10.9–percentage point absolute decrease (from 35.1% to 24.2%) in documentation time; 8.8–percentage point absolute increase (from 31.3% to 40.1%) in time spent on direct patient care                                                    |
| Pierpont and Thilgen, 1995 (69), pre-post study           | VA                                                | NS              | EHR                      | Inpatient (ICU) | Effect of computerized nursing documentation on ICU nurses' time utilization and workflow    | Efficiency                    | Time utilization    | 7–percentage point absolute decrease (from 17% to 10%) in charting time; 3–percentage point decrease (from 7% to 4%) in data-gathering time; 10% of time was spent at computer reviewing data; no change in time spent in patients' rooms |

\* ADE = adverse drug event; CCT = controlled clinical trial; CPOE = computerized provider order entry; DS = decision support; EHR = electronic health record; H<sub>2</sub>-blockers = histamine-2-blockers; HIT = health information technology; ICU = intensive care unit; NS = not specified; RCT = randomized, controlled trial; VA = Department of Veterans Affairs.
